# Supplementary material
Source: PubMed Central journal article supplement (PMC11113736)
Supplement: 18_2013_1477_MOESM1_ESM.pdf [file 18_2013_1477_MOESM1_ESM.pdf]

## SUPPLEMENTARY FIGURES

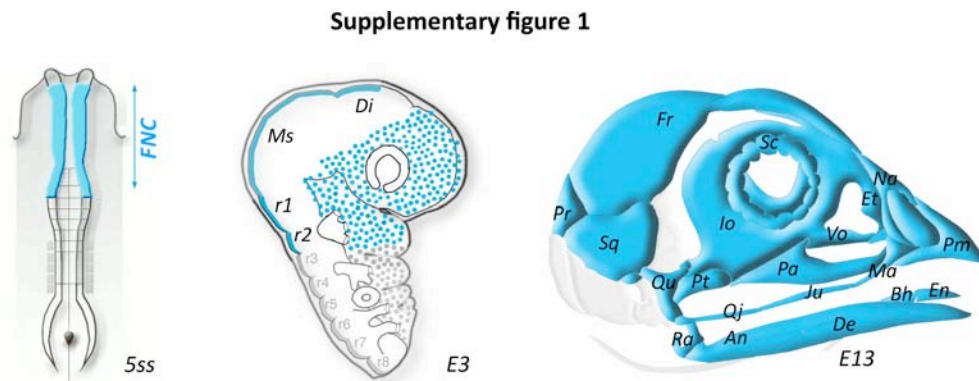

**Fig. S1: Contribution of the FNC to head development.** At 5ss, the FSNC (cyan) extends from the mid-diencephalon down to r2. At E3, FSNC cells populate the nasofrontal and maxillo-mandibular regions. At E13, the craniofacial skeleton is derived from the FNC. An, angular; Bh, basihyal; De, dentary; Di, diencephalon; En, entoglossum; Et, ethmoid; Fr, frontal; Io, interorbital septum; Ju, jugal; Ma, maxilla; Ms, mesencephalon; Na, nasal; Pa, palate; Pm, pre-maxilla; Pr, parietal; Pt, pterygoid; Qj, quadrato-jugal; Qu, quadrate; Ra, retro-articular process; Sc, sclerotic ossicles; r1, rhombomere 1; r2, rhombomere 2; Sq, squamosal; Vo, vomer.

Supplementary figure 2

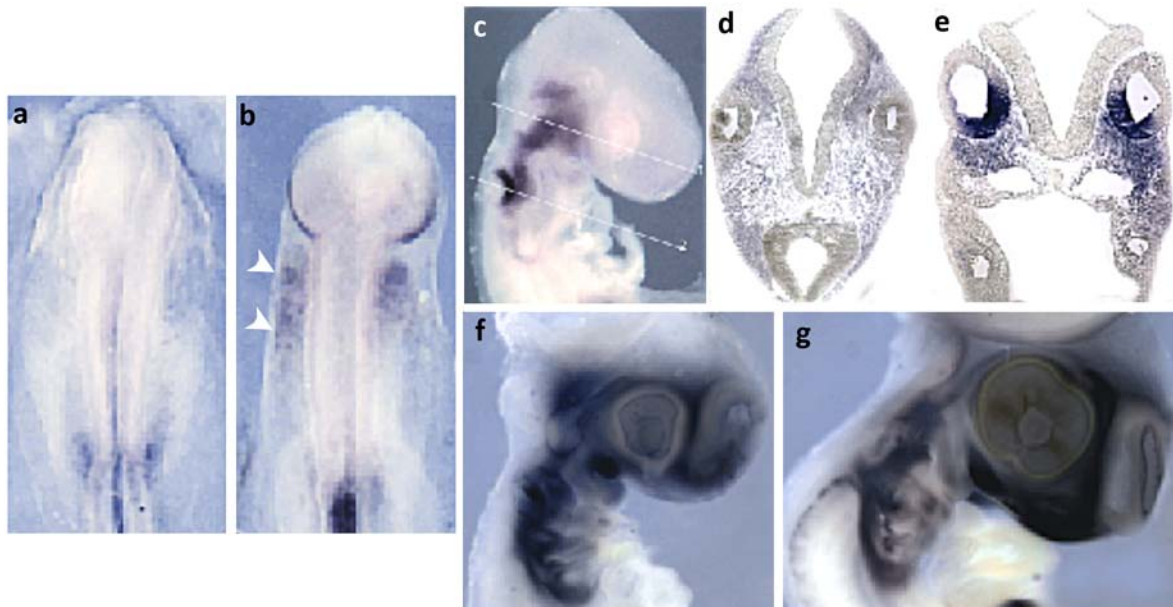

**Fig. S2: *Six2* gene expression pattern.** Hybridization of *Six2* in (a) 5ss, (b) 10ss, (c) 25ss, (f) E4 and (g) E5 chick embryos. Note the *Six2* expression in the (d) peri-optic and (e) peri-otic NC-derived mesenchyme on sections.

Supplementary figure 3

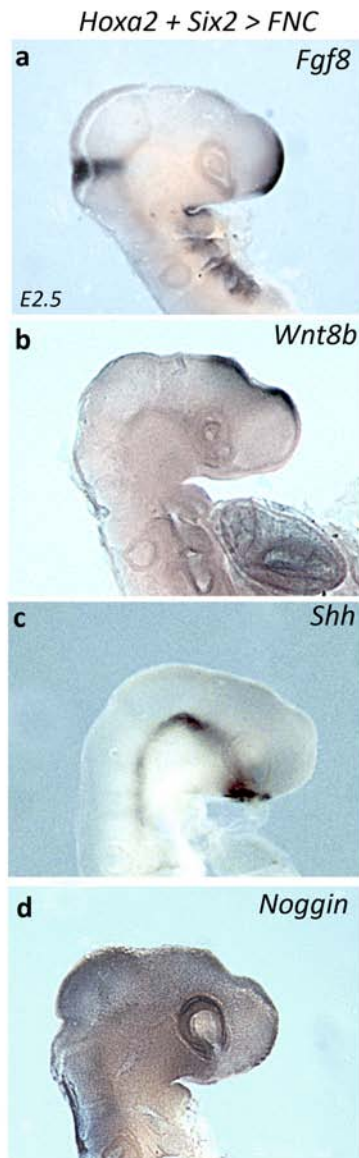

**Fig. S3: Six2 can overcome the molecular defects resulting from Hoxa2 activity.** Six2 supplementation in *Hoxa2*-transfected embryo can bypass the detrimental effect of *Hoxa2* on the expression of (a) *Fgf8*, (b) *Wnt8b*, (c) *Shh* and (d) *Noggin*.

Supplementary figure 4

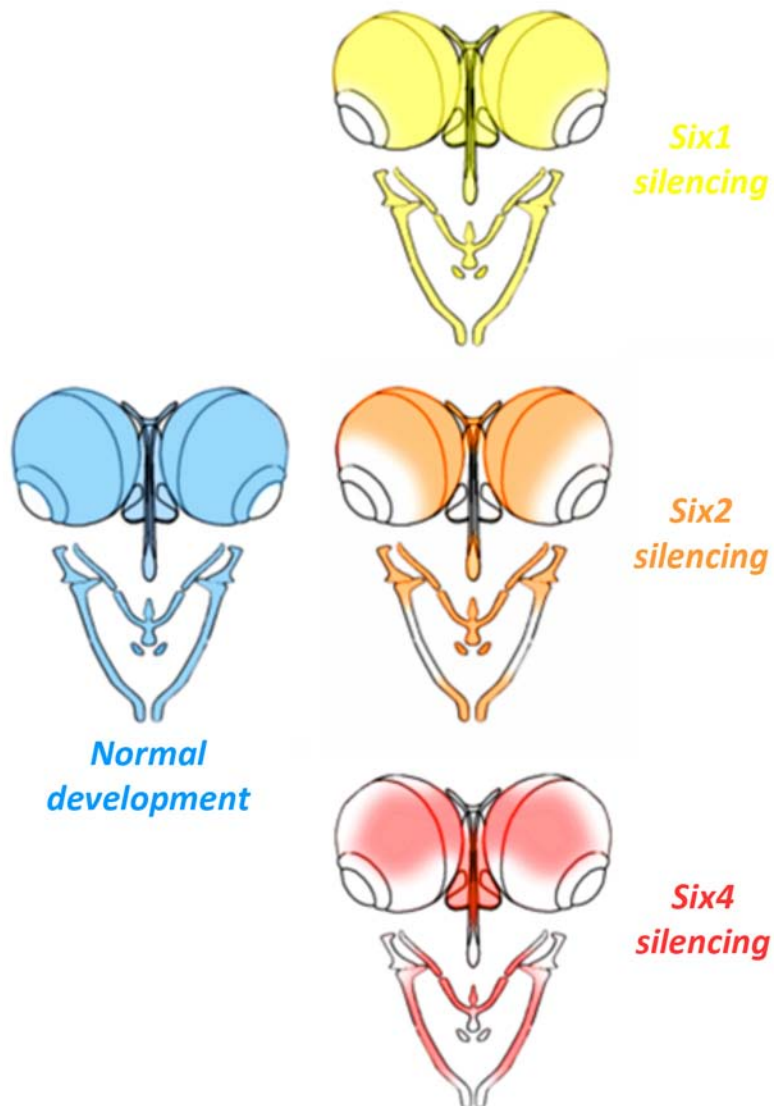

**Fig. S4: Effects of *Six* gene silencing.** Schematic diagram of the normal skeleton (blue) and the defects resulting from *Six1* (yellow), *Six2* (orange), and *Six4* (red) silencing.

Supplementary figure 5

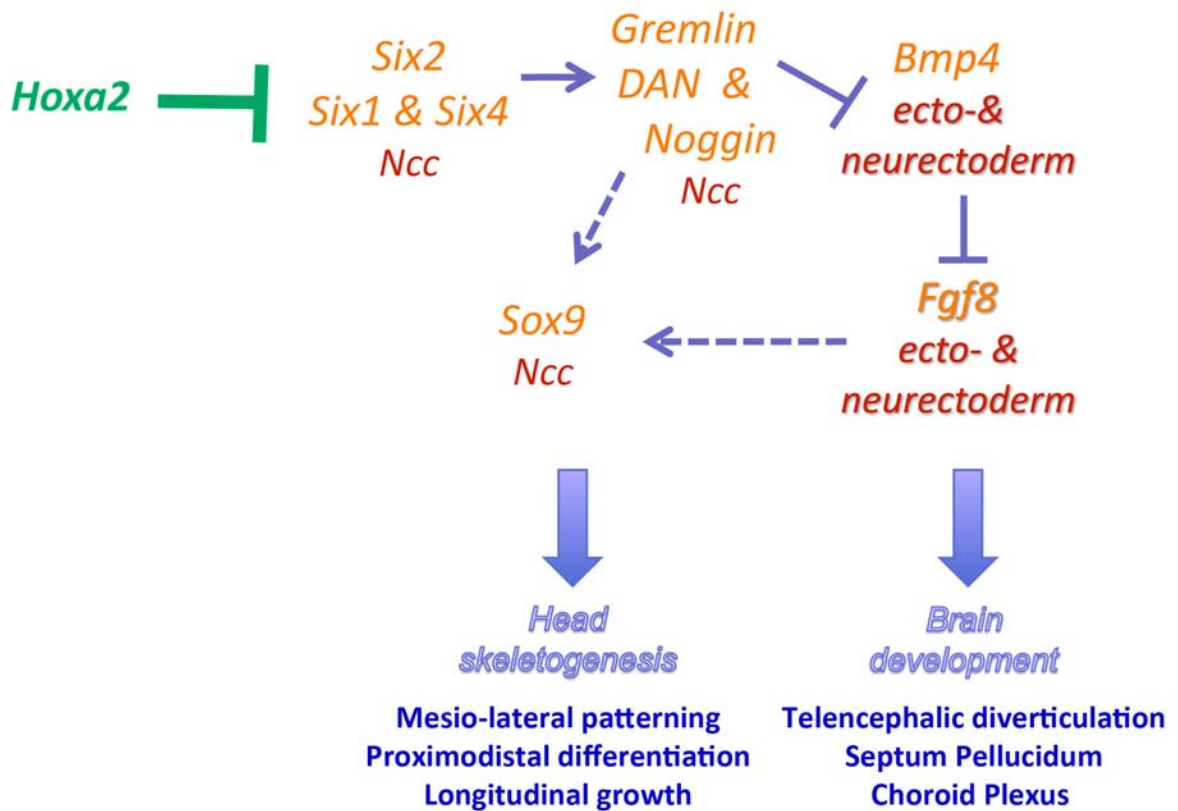

**Figure S5: Proposed model.** Summary of the epistatic relationship linking *Six* gene expression in FSNC cells to the morphogenetic control of head and brain development through the regulation of Bmp signaling. The forced expression of *Hoxa2* represses *Six1-2-4* expression, leading to an overall decrease in the production of Bmp antagonist by FNC cells. Reciprocally, this condition entails an increase in Bmp activity in the ectodermal compartments, thus inhibiting *Fgf8* activity in the ANR. This results in detrimental effects on brain development and inhibits *Sox9* expression, hence preventing head skeletogenesis.
